# Diffuse correlation spectroscopy used to monitor cerebral blood flow during adult hypothermic circulatory arrests

Alexander I. Zavriyev, BS<sup>1</sup>, Kutlu Kaya, MS<sup>1</sup>, Parisa Farzam, PhD<sup>1</sup>, Parya Y. Farzam, BS<sup>1</sup>, John Sunwoo, PhD<sup>1</sup>, Felipe Orihuela-Espina, PhD<sup>1,4</sup>, Arminder S. Jassar, MBBS<sup>2</sup>, Duke E. Cameron, MD<sup>2</sup>, Thoralf M. Sundt, MD<sup>2</sup>, Serguei Melnitchouk, MD<sup>2</sup>, Stefan A. Carp, PhD<sup>1</sup>, Maria Angela Franceschini, PhD<sup>1</sup>, Jason Z. Qu, MD<sup>3</sup>

1: Optics at Athinoula A. Martinos Center for Biomedical Imaging, Department of Radiology, Massachusetts General Hospital, Harvard Medical School, Boston, MA, USA

2: Division of Cardiac Surgery, Corrigan Minehan Heart Center, Massachusetts General Hospital, Harvard Medical School, Boston, MA, USA

3: Department of Anesthesia, Critical Care and Pain Medicine, Massachusetts General Hospital, Harvard Medical School, Boston, MA, USA

4: Computational Sciences, Instituto Nacional de Astrofísica, Óptica y Electrónica (INAOE), Puebla, Mexico

Corresponding Author: Alexander Zavriyev, 149 13<sup>th</sup> Street, Charlestown, MA, 02129, 617-726-4024, azavriyev@mgh.harvard.edu

## Abstract

Real-time noninvasive monitoring of cerebral blood flow during surgery could improve the morbidity and mortality rates associated with hypothermic circulatory arrests (HCA) in adult cardiac patients. In this study, we used a combined frequency domain near-infrared spectroscopy (FDNIRS) and diffuse correlation spectroscopy (DCS) system to measure cerebral oxygen saturation (SO<sub>2</sub>) and an index of blood flow (CBF<sub>i</sub>) in 12 adults going under cardiac surgery with HCA. Our measurements revealed that a negligible amount of blood is delivered to the brain during HCA with retrograde cerebral perfusion (RCP), indistinguishable from HCA-only cases (CBF<sub>i</sub> drops of 91% ± 3% and 96% ± 2%, respectively) and that CBF<sub>i</sub> drops for both are significantly higher than drops during HCA with antegrade cerebral perfusion (ACP) (p = 0.003). We conclude that FDNIRS-DCS can be a powerful tool to optimize cerebral perfusion, and that RCP needs to be further examined to confirm its efficacy, or lack thereof.

## Keywords

Antegrade cerebral perfusion; brain imaging; cerebral blood flow; diffuse correlation spectroscopy; hypothermic circulatory arrest; near-infrared spectroscopy; retrograde cerebral perfusion

## Introduction

Neurologic injury is one of the most dreaded complications in cardiac surgery. Maintenance of optimal brain blood flow during cardiac surgery is an essential part of ensuring patients' neurological health. Among the cardiac surgical procedures, those imposing the greatest risk of neurologic injury include procedures requiring episodes of hypothermic circulatory arrest (HCA). Hypothermia has been the mainstay of the surgical strategies to prevent cerebral ischemic injury during HCA to moderate (20.1-28°C) or deep (14.1-20°C) levels to reduce metabolic rate (1). By lowering the brain's metabolic rate, the brain can tolerate HCA without clinically significant neurological injury for 30-40 minutes (2). However, hypothermia alone may not provide adequate brain protection for patients whose surgery requires more time, or during circulatory arrest under only moderate levels of hypothermia.

Cerebral ischemia can result in both temporary injuries such as delirium and neurocognitive dysfunction, and permanent brain injury, such as stroke. Thus, it has become common clinical practice to provide cerebral perfusion to maintain blood flow to the brain during procedures requiring longer durations of HCA. The most common methods are retrograde and antegrade cerebral blood perfusion (RCP and ACP, respectively) (3). During RCP, cold blood is delivered to the brain via retrograde flow in the venous system through a cannula placed in the superior vena cava, depending on the venous plexus to ensure delivery of blood to the brain parenchyma. In selective ACP, the brain is perfused in an antegrade fashion via the arterial system, often unilaterally through the right axillary or the innominate artery.

While some studies have shown that adjunctive cerebral perfusion decreases the morbidity and mortality rates of aortic arch surgery, there is ongoing discussion regarding the best perfusion strategy for optimal neuroprotection during HCA (4,5). This is due in part to the complexity of clinical assessment of the impact of strategies on neurologic function as an endpoint and also to the limited ability to directly monitor the efficacy of each blood perfusion technique. Currently available techniques for monitoring brain health in cardiac surgery procedures include electroencephalography (EEG) and cerebral oximetry using near-infrared spectroscopy (NIRS). While providing some insight into brain protection efficacy in real-time, these monitoring techniques each present limitations. During deep HCA, EEG is used to ensure hypothermia and anesthesia are adequate to maintain the point of complete suppression of electrical activity, referred to as electrocerebral silence (6). Accordingly, functional damage cannot be detected. NIRS oximetry uses near-infrared light (650-850 nm) to estimate regional oxygen saturation (rSO<sub>2</sub>) in the brain (7); but it cannot distinguish between rSO<sub>2</sub> changes due to oxygen availability or consumption. A drop in NIRS readings may indicate a CBF drop, but it could also indicate sustained oxygen consumption as a result of insufficient hypothermia or anesthesia. The only currently available noninvasive CBF monitor is transcranial Doppler ultrasound (TCD), which measures blood flow velocity in the large basal arteries of

the brain (8); however, TCD is not suited for long term monitoring, requiring stable positioning and alignment, and is very user dependent (9).

Diffuse correlation spectroscopy (DCS) is a noninvasive optical technique that provides an index of cerebral blood flow ( $CBF_i$ ) and has been shown to effectively monitor blood flow in cardiac surgical procedures in neonates pre- and/or postoperatively (10–12). It makes use of the speckle interference pattern formed when coherent light travels through a scattering medium. The pattern perturbs as the scattering centers drift, and by computing the intensity autocorrelation of speckles  $g_2(\tau)$ , one can estimate the velocity of moving scatterers (13). Since red blood cells form the overwhelming majority of moving scatterers in tissue, DCS provides an index of blood flow in the illuminated tissue (i.e. scalp, skull, and brain). Studies have demonstrated that DCS is a useful tool for continuous monitoring of  $CBF_i$  (14,15) and holds promise for differentiating pathological conditions such as ischemia and passive hyperemia (16). DCS measurements are conducted via a lightweight patch probe that can stay attached to the patient's head for however long is necessary, making it a strong candidate for use in the operating room. Further, it is possible to use both NIRS and DCS synergistically and acquire an index of cerebral metabolic rate of oxygen ( $CMRO_{2i}$ ), a more comprehensive measure of brain health (17).

In this study, we use a hybrid instrument combining frequency-domain near-infrared spectroscopy (FDNIRS) and DCS to understand the course of cerebral perfusion during hypothermic circulatory arrest procedures in an adult population. We believe that our work proves the feasibility of acquiring both cerebral oxygenation ( $SO_2$ ) and  $CBF_i$  noninvasively during surgery and illustrates a potentially effective monitoring approach to reducing the perioperative neurological injury and subsequent morbidity and mortality in HCA procedures.

## **Materials and Methods**

### *Subjects*

We enrolled twelve patients (7 males, 5 females, mean age  $62 \pm 19$  years) scheduled to undergo elective cardiac surgery with use of circulatory arrest (4 HCA-only, 3 RCP, 5 ACP) at the Massachusetts General Hospital (MGH). Potential HCA patients were approached during their preoperative visit, between 3 and 10 days before the scheduled surgery. The study was explained to the patients by a physician and they had until the day of the surgery to decide whether to participate. All patients signed a written informed consent. This study was reviewed and approved by the Partners Healthcare Human Research Committee (IRB; #2016P001944). Table 1 outlines the patients' demographic distribution.

| #  | Sex | Operative Procedure                                                                  | Avg HCA Temp (°C)          | Cerebral Perfusion | CA Length  | Optical Modality | INVOS | Monitoring Duration |
|----|-----|--------------------------------------------------------------------------------------|----------------------------|--------------------|------------|------------------|-------|---------------------|
| 1  | M   | Valve sparing aortic root replacement + AAHR                                         | 23.2 ± 0.2                 | HCA-Only           | 12 m       | DCS              | No    | 3 h 30 m            |
| 2  | M   | CABG x 3 + AVR + Ascending aortic replacement                                        | 16.8 ± 0.2                 | HCA-Only           | 25 m       | DCS              | No    | 4 h 52 m            |
| 3  | F   | Right pulmonary thromboendarterectomy + Left lower lobe wedge resection              | 19.6 ± 0.1,<br>19.4 ± 0.03 | HCA-Only           | 19 m, 12 m | FDNIRS-DCS       | Yes   | 4 h 44 m            |
| 4  | F   | AVR + CABG x 1 + Pulmonary vein isolation + LAA ligation + AAHR                      | 20.3 ± 0.2                 | HCA-Only           | 29 m       | FDNIRS-DCS*      | Yes   | 6 h 56 m            |
| 5  | M   | Valve sparing aortic root replacement + AAHR                                         | 17.9 ± 0.1                 | RCP                | 17 m       | DCS              | No    | 8 h 02 m            |
| 6  | F   | AVR + Pulmonary vein isolation + LAA ligation + AAHR                                 | 18.4 ± 0.1                 | RCP                | 21 m       | FDNIRS-DCS       | Yes   | 5 h 33 m            |
| 7  | M   | AVR + AAHR                                                                           | 18.2 ± 0.1                 | RCP                | 22 m       | FDNIRS-DCS       | Yes   | 5 h 30 m            |
| 8  | M   | AVR + AAHR                                                                           | 24.9 ± 0.1                 | ACP                | 20 m       | DCS              | No    | 6 h 53 m            |
| 9  | F   | AVR + AAHR                                                                           | 27.1 ± 0.1                 | ACP                | 14 m       | FDNIRS-DCS       | No    | 4 h 26 m            |
| 10 | M   | AAHR                                                                                 | 22.0 ± 0.7                 | ACP                | 20 m       | FDNIRS-DCS       | Yes   | 3 h 57 m            |
| 11 | M   | Redo Sternotomy + total arch replacement                                             | 20.2 ± 0.1                 | ACP                | 48 m       | FDNIRS-DCS       | Yes   | 5 h 57 m            |
| 12 | M   | Redo Sternotomy + AVR + CABG x 4 + Ascending aortic + Zone I aortic arch replacement | 18.8 ± 0.1                 | ACP                | 47 m       | FDNIRS-DCS*      | Yes   | 10 h 35 m           |

**Table 1:** Demographics and intraoperative data of measured patients. Monitoring duration started immediately after anesthesia induction and ended after the procedure concluded. Patient #3 had two circulatory arrests. In 8 patients we used combined FDNIRS-DCS, and only DCS in 4. 7 patients had bilateral cerebral oximetry (INVOS) acquired clinically. RCP flow rate was maintained at 300-400 ml/min to target a CVP of 20-25 mm Hg. AVR = aortic valve replacement; CABG = coronary artery bypass grafting; LAA = left atrial appendage; AAHR = Ascending aortic and hemiarch replacement. HCA = Hypothermic Circulatory arrest; RCP = Retrograde Cerebral Perfusion with HCA; ACP = Antegrade Cerebral Perfusion with HCA. Circulatory arrest time refers to the length of time the cardiopulmonary bypass flow to the heart was stopped (with or without cerebral perfusion). \*Interference with the INVOS made it so FDNIRS data are only available discontinuously.

#### *FDNIRS-DCS Device*

For these measurements, we used a commercial combined FDNIRS-DCS system, MetaOx (ISS Inc. Champaign, IL). Details about this device can be found in Carp et al. (18). In four subjects, only the DCS component was used, and in the rest both DCS and FDNIRS data were acquired simultaneously (Table 1). The DCS component employed a single 35 mW, 850 nm light source and 8 photon counting detectors. The

FDNIRS component included eight 2 mW light sources ranging between 670 and 830 nm in wavelength, and 4 photomultiplier tube detectors. The fiber optic probe used is shown in Figure 1.

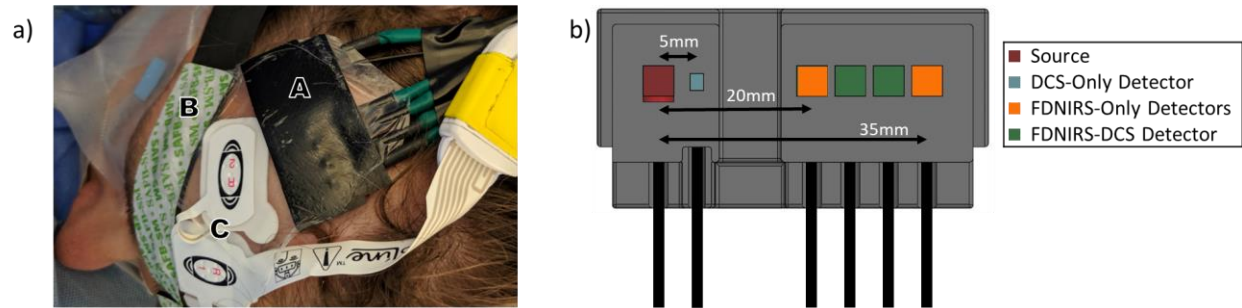

**Fig. 1:** a) Photograph of our optical probe on a patient: A = Frequency-domain near infrared spectroscopy and diffuse correlation spectroscopy (FDNIRS-DCS) optical probe, B = Hospital INVOS Oximeter Probe, C = processed electroencephalogram probe. b) Schematic of the FDNIRS-DCS probe. NIRS and DCS light source fibers (dark red square) are colocalized and diffused over a 3.5 mm spot diameter to meet American National Standards Institute standard irradiance limits. A DCS short separation detector fiber (light blue) is located 5 mm from the source center and used to detect scalp blood flow. Remaining DCS detector fibers (green) were located at 25 and 30 mm from the source for higher sensitivity to cerebral blood flow. For patients that also had FDNIRS measurements, in addition to the co-localized 25 and 30 mm detector fibers, we had 2 detector fibers located at 20 and 35 mm from the source, except for patient #9, where the two extra detectors were at 15 and 20 mm from the source. Multiple separations in FDNIRS allow for application of the multi-distance method to calculate  $SO_2$ . Note: our probe is small and lightweight and doesn't require special training to correctly operate.

### *Experimental Procedure*

The optical probe was positioned on the patient's forehead after induction of general anesthesia. Other parameters were obtained from the Epic electronic medical record system such as electrocardiogram, pulse oximetry, cerebral oximetry (INVOS 5100c, Medtronic, Minneapolis MN; present in 7 patients), nasopharyngeal temperature, and intra-arterial blood pressure. These signals were co-registered with our data at one point per minute resolution. MAP was also collected directly with our device at 10 Hz resolution. The optical probe was secured against the right side of the patient's forehead when possible. In three patients (Patients #2, 6, 11), cerebral oximetry and EEG were placed on the right side of the forehead in a way that did not leave enough room for the FDNIRS-DCS probe, so we placed the probe on the left side. We secured the probe several centimeters above the eyebrow and used surgical tape to secure the probe to the patient. To shield from ambient light, a soft black craft cloth was taped over the probe. Data collection began immediately after anesthesia induction and ended after chest closure (shortest: 3 h 30 m; longest: 10 h 35 m; mean: 5 h 54m  $\pm$  1 h 58m, stdev). After data collection, we calibrated the FDNIRS detectors using three calibration blocks of known-optical properties.

### *Signal Processing and Analysis*

Both DCS and FDNIRS signals were down-sampled from 10 Hz to 0.2 Hz, then smoothed by a 25-second moving average. Signal artifacts due to movement or interference from the INVOS NIRS were removed

during preprocessing. For FDNIRS, we used the frequency-domain multi-distance method (19,20) to compute the absorption and scattering coefficients of measured tissue. From the absorption coefficient, we estimated oxy- and deoxy- hemoglobin concentration and  $SO_2$ . For DCS, the semi-infinite medium correlation diffusion equation (13) was used to obtain an index of blood flow ( $BF_i$ ) at short and larger source-detector separations. To calculate  $BF_i$  we used fixed absorption and reduced scattering coefficients,  $\mu_a = 0.11\text{cm}^{-1}$  and  $\mu'_s = 8.5\text{cm}^{-1}$ , obtained extrapolating to 850 nm the average coefficients obtained across all the subjects measured with FDNIRS.

$CMRO_{2i}$  before and after HCA was calculated using Fick's Principle (28) (details in the supplemental materials), and because of the need for measured optical properties to quantify  $CBF_i$  and  $SO_2$ , only the 6 patients with continuous FDNIRS data were included in this analysis.

### *Statistical Analysis*

Data normality was calculated using a Shapiro-Wilk test and expressed as mean  $\pm$  standard deviation. Statistical analyses were performed with a one-way ANOVA to compare the ratio of  $CBF_i$  and  $SO_2$  during vs pre-HCA among the three groups, followed by Dunnett T3 post hoc test for pairwise comparisons. Correlation analyses were performed with a Pearson test to reveal the relationship between  $CMRO_{2i}$  and temperature. Statistical significance was evaluated by using a one tail  $t$ -distribution table with a 95% confidence interval. All tests were applied one-sided due to  $CMRO_{2i}$  and temperature having a positive relation, and  $p < 0.05$  was considered statistically significant.

### **Results**

The average total HCA time across patients was  $24 \pm 12$  minutes. The average brain temperatures during HCA for HCA-only, RCP and ACP patients are  $19.9 \pm 2.3$  °C,  $18.1 \pm 0.3$  °C and  $22.6 \pm 3.4$  °C, respectively.

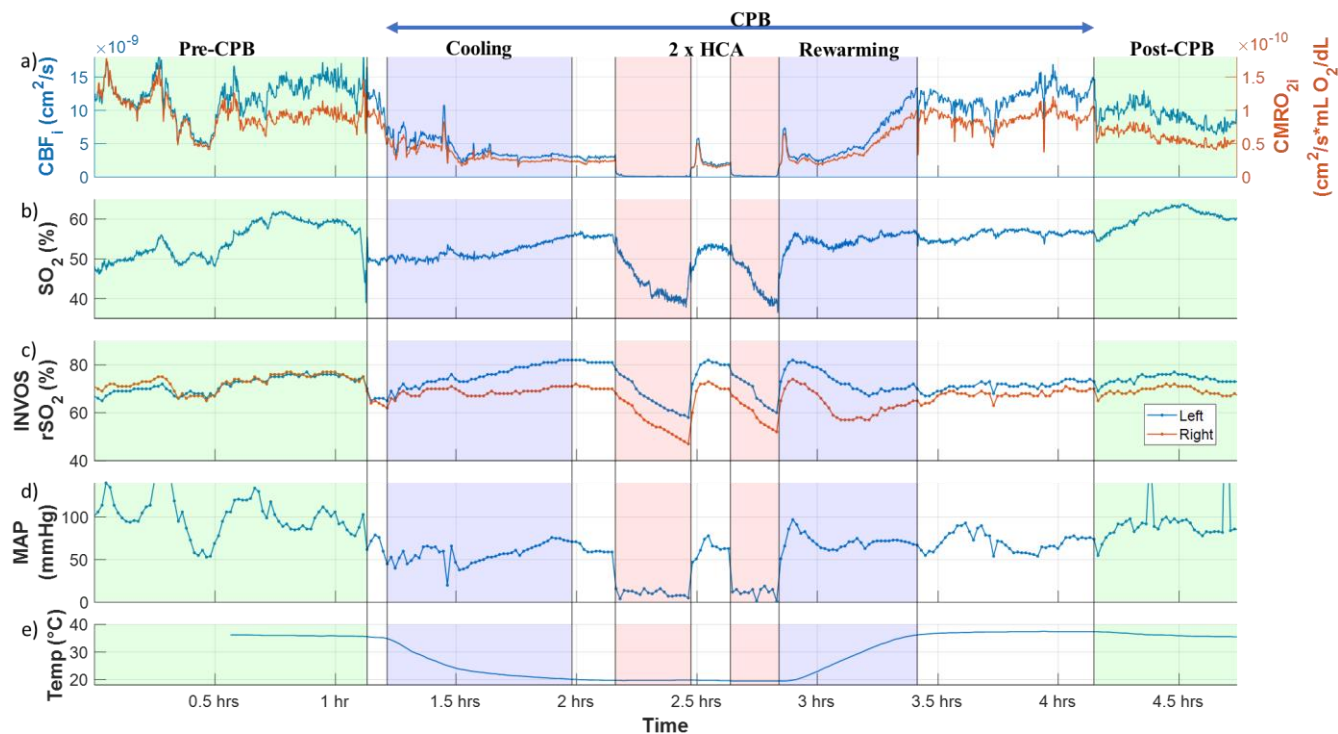

**Fig. 2:** Full measurement of a patient (#3) during a pulmonary thromboendarterectomy with two periods of hypothermic circulatory arrest without any additional perfusion (HCA-only). Cerebral blood flow index ( $CBF_i$ , panel a, blue, left axis), cerebral metabolic rate of oxygen index ( $CMRO_{2i}$ , panel a, red, right axis), and hemoglobin oxygenation ( $SO_2$ , panel b) are measured by our combined frequency-domain near infrared spectroscopy and diffuse correlation spectroscopy (FDNIRS-DCS) device. The remaining three panels show the INVOS regional oxygen saturation ( $rSO_2$ ) measured in the left (panel c, blue) and right (panel c, red) forehead, mean arterial pressure (MAP) as measured via an arterial cannula in the arm (panel d), and temperature measured with a nasopharyngeal probe (panel e) throughout the surgery. In sections shaded in light green the patient's heart is driving blood circulation. In all other sections, the patient is on cardiopulmonary bypass (CPB). Noteworthy trends include the high correlation between  $CBF_i$ ,  $CMRO_{2i}$  and temperature, the immediate measured drop to zero of the  $CBF_i$  at the beginning of each HCA, followed by the sharp overshoots at the end of HCA, and finally, the high correlation between  $SO_2$  measurements taken via FDNIRS and the INVOS oximeter.

### *$CBF_i$ and $SO_2$ perioperative monitoring*

Figure 2 shows a characteristic measurement of an HCA-only patient from start to finish (patient #3). We identified 6 phases: Pre-CPB, CPB, cooling, HCA, rewarming, and post CPB. A wide range in  $CBF_i$  (panel a, left axis) can be seen throughout the surgery. Under CPB and cooling,  $CBF_i$  decreases substantially following the temperature decrease (panel e), while  $SO_2$  (panel b) remains constant, consistent with the reduction in  $CMRO_{2i}$  (panel a, right axis). The most drastic change in  $CBF_i$  and  $SO_2$  happens during circulatory arrest. This patient underwent two HCAs with no perfusion, and on both occasions  $CBF_i$  dropped to near zero within 30 seconds and  $SO_2$  gradually decreased at an average rate of 1% per min. The FDNIRS  $SO_2$  and the INVOS  $rSO_2$  (panel c) show differences in the absolute values due to the different assumptions made with the two devices but exhibit the same trends.

Figure 3 shows the  $CBF_i$  and  $SO_2$  time traces for an HCA-only case, an RCP case, and an ACP case, focusing on the HCA period.

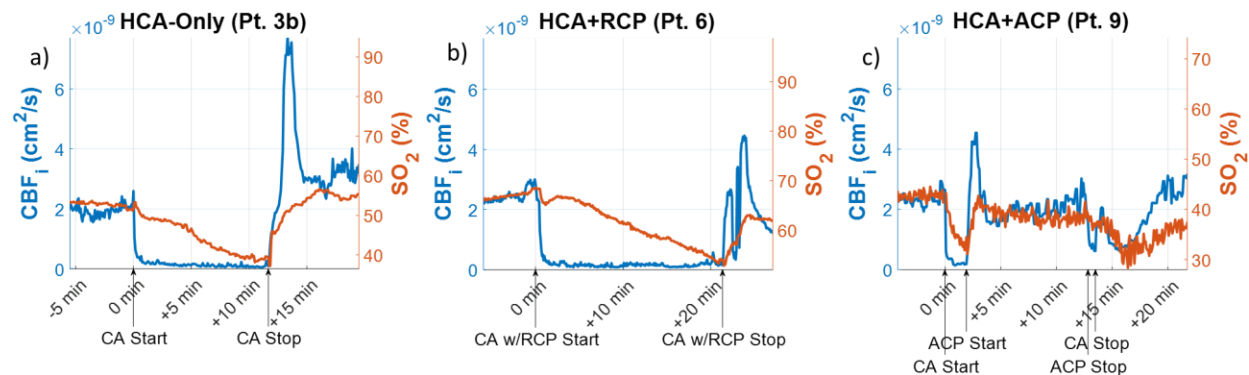

**Fig. 3:** Cerebral blood flow index ( $CBF_i$ , blue, left axis) and hemoglobin oxygen saturation ( $SO_2$ , red, right axis) measured by our combined frequency-domain near infrared spectroscopy and diffuse correlation spectroscopy (FDNIRS-DCS) device. a) Patient #3 during the second hypothermic circulatory arrest with no extra perfusion (HCA-only).  $CBF_i$  dropped  $94 \pm 3\%$  within the first minute of HCA. The patient's  $SO_2$  decreased by  $14 \pm 1\%$  over the 12-minute HCA ( $1.2 \pm 0.1\%$  per minute); b) Patient #6, who underwent HCA with retrograde cerebral perfusion (RCP).  $CBF_i$  dropped  $93 \pm 3\%$  within the first minute of HCA.  $SO_2$  dropped at a slower rate ( $0.7\%$  per min) than the HCA-only patient and dropped by  $23 \pm 1\%$  after 20 minutes of HCA; c) Patient #9, who underwent HCA with antegrade cerebral perfusion (ACP).  $CBF_i$  dropped by  $92 \pm 0.3\%$  and  $SO_2$  had a drop-rate of  $2 \pm 0.01\%$  per min between HCA start and ACP start. The higher drop-rate of  $SO_2$  in this case is likely due to higher cerebral metabolic activity, being at a higher temperature ( $27.1^\circ\text{C}$ ). Both  $CBF_i$  and  $SO_2$  quickly recovered to almost pre-HCA values after ACP start and were maintained until ACP stop. It is notable that cerebral perfusion does not increase during an RCP procedure. This was indicated by  $CBF_i$  more promptly than  $SO_2$  signal. Furthermore, HCA-only and RCP cases display a large overshoot at reperfusion that is identifiable only in the  $CBF_i$  time trace.

#### *$CBF_i$ and $SO_2$ behavior at circulatory arrest*

To examine cerebral perfusion changes during circulatory arrest, we quantified the ratios of  $CBF_i$  during versus pre-HCA for each patient (Figure 4a). Unsurprisingly, HCA-only patients saw a  $CBF_i$  drop of  $96 \pm 2\%$ . RCP patients had a drop in  $CBF_i$  of  $91 \pm 3\%$ , while ACP patients had a mean increase in  $CBF_i$  of  $14 \pm 36\%$ , with patient #10 receiving 50% more blood flow during ACP than before HCA.

There was a statistically significant difference among the three techniques as determined by one-way ANOVA ( $F_{2,10} = 51.75$ ,  $p = 0.001$ ). A Dunnett T3 post hoc test confirmed that the ratio of  $CBF_i$  during versus pre-HCA was significantly lower in HCA-only ( $0.054 \pm 0.009$ ) and RCP ( $0.08 \pm 0.03$ ) cases with respect to ACP ( $1.11 \pm 0.28$ ) cases. The mean difference between HCA-only and ACP was statistically significant ( $p = 0.003$ ). The mean difference between RCP and ACP cases was also statistically significant ( $p = 0.003$ ). Importantly, there was no statistically significant difference between the HCA-only and RCP ( $p = 0.51$ ) cases.

Figure 4b reports the total  $SO_2$  drop and 4c reports the drop-rate due to HCA in all patients that had FDNIRS measurements. The  $SO_2$  total drops and drop-rates for HCA-only and HCA with RCP cases were similar,



with total mean drops of  $18 \pm 4\%$  in HCA-only and  $13\%^*$  in RCP, and mean drop-rates of  $1 \pm 0.2\%$  per min in HCA-only and  $0.6\%^*$  per min in RCP. Meanwhile, HCA with ACP mostly maintained  $SO_2$  throughout the HCA, with a mean total drop of  $3 \pm 3\%$  and a mean drop-rate of  $0.2 \pm 0.2\%$  per min.

At the end of HCA in the HCA-only and RCP cases we observed a transient  $CBF_i$  overshoot. The mean  $CBF_i$  overshoots were  $2.4 \pm 0.5$  and  $2.5 \pm 0.7$  times higher than the post-HCA recovery values. There was not significant overshoot in the ACP cases and no overshoot of  $SO_2$  in any cases.

We also quantified group averages for drops in the INVOS regional oxygen saturation. The mean INVOS  $rSO_2$  right side drop was  $26 \pm 10\%$  in HCA-only,  $12\%^*$  in RCP and  $2 \pm 6\%$  in ACP cases. The mean INVOS  $rSO_2$  left side drop was  $27 \pm 10\%$  in HCA-only,  $7\%^*$  in RCP and  $10 \pm 11\%$  in ACP cases. We also report changes in mean arterial pressure (MAP) at HCA (Table 2 in the Supplementary Material).

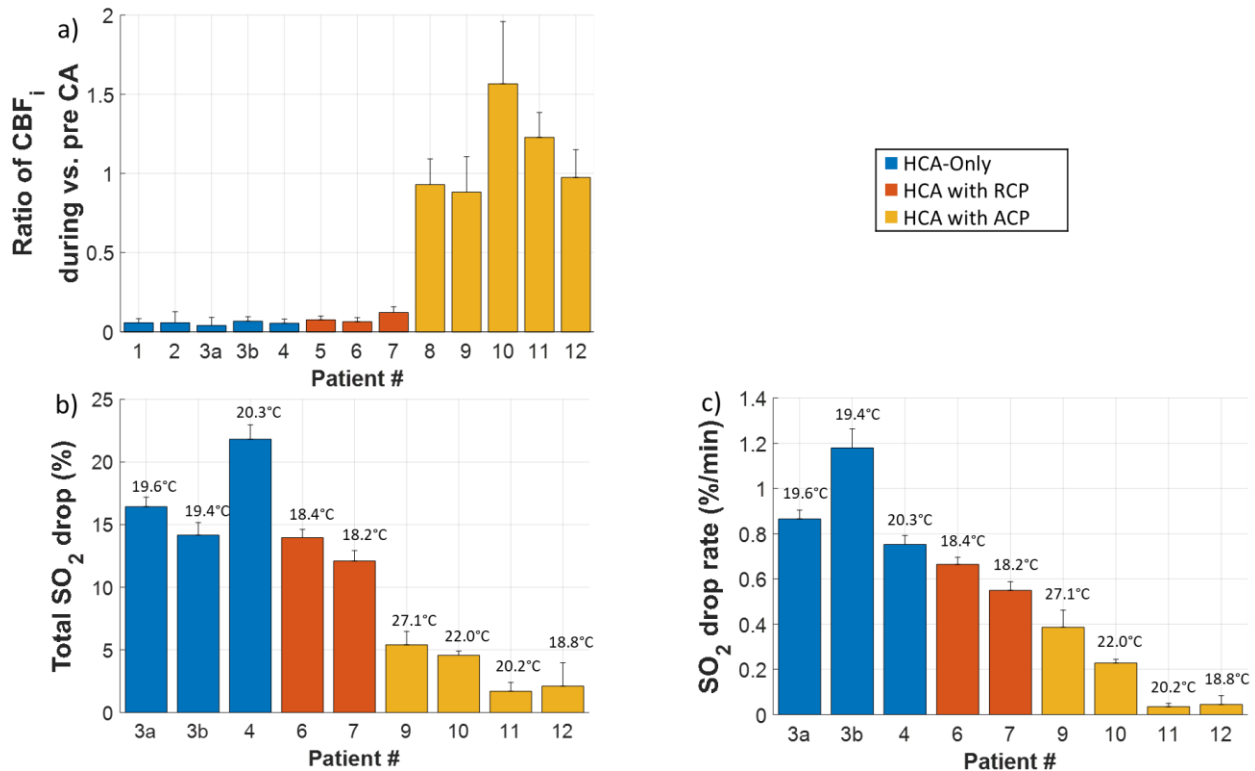

**Fig. 4:** Changes in  $CBF_i$  and  $SO_2$  during HCA versus pre-HCA measured in different brain protection techniques. Error bars represent standard deviations, calculated by propagation of error of starting and ending baselines. a) The ratios of  $CBF_i$ . Pre-CA interval was identified as a one to ten-minute period immediately before HCA start. During HCA was defined as the average from one minute into HCA to the HCA stop time. b) Percent drop of  $SO_2$  measured with FDNIRS-DCS device. Values were averaged for 30-60 seconds for both pre-CA and end of HCA values. Numbers above bars indicate average temperature during HCA. c) Average drop-rate of  $SO_2$  through HCA. HCA durations were determined using electronic records and are precise to the minute.

\* No error is shown as there are  $\leq 2$  patients in this sample

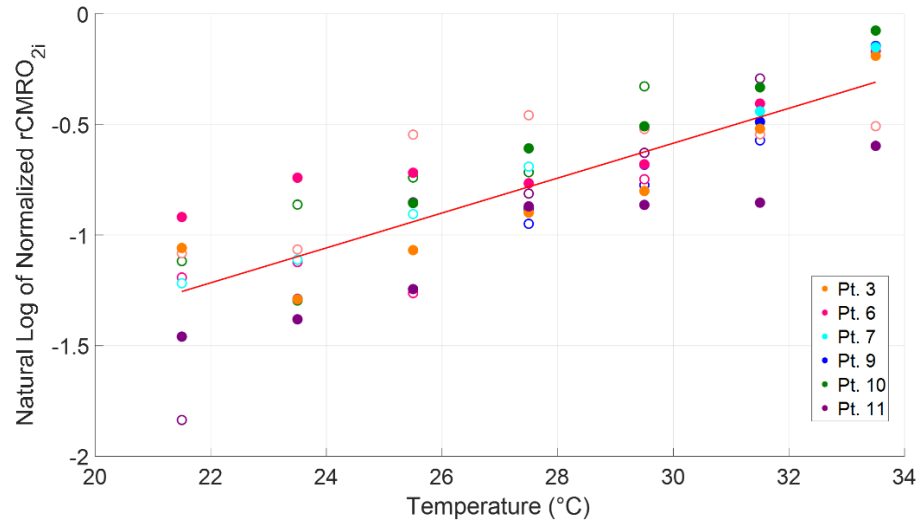

**Fig. 5:** Log of the normalized cerebral metabolic rate of oxygen index ( $CMRO_{2i}$ ) versus temperature in 6 patients that had continuous frequency-domain near infrared spectroscopy and diffuse correlation spectroscopy (FDNIRS-DCS) measurements. Each patient is indicated by a different color. Open markers indicate cooling periods and filled markers indicate rewarming periods. Each patient's  $CMRO_{2i}$  values are normalized with respect to average  $CMRO_{2i}$  between 34.5-36.5 °C during patient rewarming. The red line is the linear fit, which demonstrates the expected temperature linear dependence. \*Pearson correlation coefficient  $r=0.84$ , statistically significant at the 0.01 level.

#### *Relationship between temperature and $CMRO_{2i}$*

Figure 5 shows temperature dependency of  $CMRO_{2i}$  during CPB through the range of 18-35.5 °C ( $t_{10}$ , 0.005,  $p = 0.001$ ) in 6 patients who had continuous FDNIRS measurements (Patients #2-4, 6-7, 9-10). Each data point represents the average  $CMRO_{2i}$  values for the cooling/rewarm periods at the temperature value  $\pm 1$  °C. As expected,  $CMRO_{2i}$  is strongly positively related to temperature,  $r = 0.84$ ,  $p < 0.01$ .

#### *Correlations*

On average across all subjects, the correlation coefficient between  $CBF_i$  and MAP was weak,  $0.29 \pm 0.36$ , and there was no correlation between  $CBF_i$  and  $SO_2$ , correlation coefficient  $-0.15 \pm 0.41$ . Instead, as expected, the correlation between our continuous FDNIRS  $SO_2$  measurements and the INVOS was high,  $0.82 \pm 0.14$ .

#### **Discussion**

This is the first report using FDNIRS-DCS to evaluate the efficacy of commonly used brain protection strategies during HCA in adult cardiac surgery procedures.

In the interval since deep HCA was first successfully used during aortic arch surgery over thirty years ago, clinical outcomes have significantly improved (4). The development of adjunct cerebral perfusion techniques has allowed cardiac surgeons to perform more complex operations that require longer durations

of HCA. However, aortic arch surgery is still associated with a 5-10% risk of clinically significant neurologic injury, and much higher risk of subclinical neurological insult (21). The lack of reliable intraoperative brain monitoring techniques remains a limitation as we try to determine the best brain protection strategy during HCA. EEG, TCD and NIRS have all been used, but none of them can reliably provide a measure of cerebral protection, which is essential during HCAs with ACP or RCP. This stimulated us to use DCS, which gives us a direct measure of blood flow index, is easy to use and allows for continuous monitoring.

#### *CBF<sub>i</sub> and SO<sub>2</sub> in HCA-only and HCA with RCP*

RCP was introduced in aortic arch surgery to provide adjunctive brain protection in addition to hypothermia. It is reported to reduce stroke risk by flushing out air or debris from the brain that may enter during the manipulation of the aorta and head vessels (4). The efficacy of RCP to provide nutritive brain perfusion, however, has been challenged by Ehrlich et al., who showed (using microsphere calculations) that in pigs undergoing HCA with RCP, less than 13% of the blood perfusate from RCP makes its way out of the arterial system, with negligible flow reaching the brain (22). Our measurements showed that brain flow during RCP was indistinguishable from that of HCA-only patients, consistent with the study by Erlich et al. The negligible amount of blood flow we detected further questions the efficacy of RCP as a neuroprotective method.

An unexpected finding of our study was the detection of a reperfusion overshoot in cerebral blood flow in the HCA-only and the RCP groups immediately after the conclusion of circulatory arrest. The ACP patients had no significant CBF<sub>i</sub> drop during HCA and as a consequence did not exhibit a blood flow reperfusion overshoot at the end of HCA. Importantly, the rapid and large increase of blood flow in HCA-only and RCP patients may put them at a higher risk of hyperperfusion injury on resumption of CPB flow. Given data indicating that cerebral hyperperfusion may be associated with postoperative delirium; DCS could be useful in warning not only about low but also dangerously high cerebral flow levels (23–25). DCS was uniquely able to recognize brain hyperperfusion post-CA as this phenomenon was not reflected in the slower reacting SO<sub>2</sub> readings, which gradually returned to pre-HCA levels.

Combined, DCS and FDNIRS (which is highly valuable in monitoring progressive ischemia during HCA) can provide useful information during HCA, alerting the clinical team whether the brain is perfused as expected.

#### *CBF<sub>i</sub> and SO<sub>2</sub> in HCA with ACP*

Because it provides oxygenated blood in a more physiological manner, ACP has become more popular than RCP over the past fifteen years. Most surgeons choose the right axillary artery for ACP, titrating ACP flow

to a pressure of 50-70 mmHg and flow of 6-10 ml/kg/m to provide adequate brain perfusion (23). However, these established ACP flow rates are largely based on the empiric data and retrospective studies, with no direct measurements supporting it. Also, older patients may have a partially degraded circle of Willis, potentially compromising contralateral brain oxygenation (26). If the contralateral  $SO_2$  levels drop during HCA, the clinicians may ask to raise perfusion pressure or increase flow to facilitate left hemisphere perfusion. While this may be helpful in the setting of an intact circle of Willis, in others this can raise intracranial pressure and potentially cause ipsilateral brain injury without improving contralateral perfusion. DCS could potentially be a valuable tool to not only warn if flow is not reaching the contralateral side of the brain, but also to detect dangerously high flow ipsilaterally. In the current study, the DCS probe was placed only on the right side in all but one patient in the ACP group (#11), but in this subject we did not see flow reduction during HCA. However, in one patient (#10) we saw a large increase of  $CBF_i$  in the right hemisphere and a drop in INVOS  $rSO_2$  in the left side (see supplementary Figure 8). It is possible that in this patient the circle of Willis was not working properly and perfusion in the contralateral side was reduced during ACP. A bilateral measurement of  $CBF_i$  would allow monitoring of ACP efficacy in both brain hemispheres and help identify patients that will benefit from institution of bilateral cerebral perfusion.

Because of the heterogeneity of patients undergoing aortic arch surgeries, we can expect that ACP flow rates should be individualized for each patient. Further study is needed to confirm that regulating blood flow with DCS could provide better brain protection and allow optimization of ACP flow rates during HCA.

#### *Study Limitations and Additional Comments*

A limitation of our study is the lack of bilateral measurements comparing hemispheres, which is particularly of interest to ensure bilateral brain perfusion during unilateral ACP.

It is worth noting the disparity between the  $SO_2$  values measured by the INVOS versus FDNIRS. The INVOS  $rSO_2$  shows higher values and drops than the FDNIRS values, likely because of the strong assumptions made with the continuous wave device (27). Nevertheless, the correlation between the two measurements is very high.

The measured  $CBF_i$  during HCA-only does not reach absolute zero. While in normal physiological states, DCS measurements are driven by red blood cell movement, when blood flow is stopped, however, the residual thermal (Brownian) motion will result in a non-zero DCS perfusion estimate. This Brownian motion contribution is ~1% of the signal in normal conditions, so there is no significant contribution from Brownian motion to  $CBF_i$  until it drops more than 90% from physiological levels.

A challenge in using DCS, like in NIRS, is ensuring that the signals are representative of the brain and not the scalp. The signals at short and large separations were compared to determine the sensitivity of the large

separation to cerebral blood flow. In all data sets we observed differences in relative signal changes between the short and long separations. Also, expecting brain blood flow to be higher than scalp blood flow, in ten of our twelve measurements we observed larger  $BF_i$  values in the long separations, with some periods reporting almost two times the value of the short separation. We therefore believe that our longer separations are sensitive to the brain blood flow. For the two measurements (IDs #1 and 6) where the short separation  $BF_i$  was higher, we believe the probe may have been placed directly over or near to a superficial vessel, causing short separation DCS to report higher than normal flow. The conclusions of our data analysis did not change based on the inclusion or exclusion of these two data sets, so we kept both in our analysis.

### *Conclusions*

We conclude that DCS reliably measures cerebral blood flow index and uniquely identifies periods of brain hypoperfusion and hyperperfusion during cardiac surgical procedures using circulatory arrest. We further state that RCP should be investigated further for proof of efficacy, or lack thereof. Overall, DCS alone or combined with NIRS can potentially guide brain protection to help clinicians achieve optimal brain perfusion.

### **Acknowledgments**

The authors thank Zack Starkweather for designing the optical probes and Adriano Peruch for device designs. Thank you to Juliette Selb, Melissa Wu and Vidhya V. Nair for their contributions to data acquisition.

### **Author contribution statement**

Conceived of and designed the study: AIZ, KK, PF, PYF, SAC, MAF, JZQ; Acquired data: AIZ, KK, PF, PYF, SAC; Wrote analysis software: AIZ, PF, FOE; Data analysis and figures: AIZ; Provided valuable advice for analysis: KK, PF, JS, FOE, ASJ, SAC, MAF; Statistical analysis: KK; Wrote the manuscript: AIZ, KK, MAF, JZQ; Contributed to writing the manuscript: all authors; Performed or helped with surgical procedures: ASJ, DEC, TMS, SM, JZQ. Final approval of the version to be published: all authors.

### **Conflict of interest statement**

MAF has financial interest in 149 Medical, Inc., a company developing DCS technology for assessing and monitoring cerebral blood flow in newborn infants, and in Dynometrics, Inc., a company that makes devices that use NIRS technology for athletes to evaluate muscle performance. MAF interests were reviewed and are managed by Massachusetts General Hospital and Mass General Brigham (f/k/a/ Partners HealthCare) in accordance with their conflict of interest policies.

### **Supplementary Material**

Supplementary material for this paper can be found at [MexRxiv.org](https://www.medrxiv.org)

### **References**

1. Mezrow CK, Sadeghi AM, Gandsas A, Dapunt OE, Shiang HH, Zappulla RA, et al. Cerebral effects of low-flow cardiopulmonary bypass and hypothermic circulatory arrest. *The Annals of thoracic surgery*. 1994 Mar;57(3):532–9; discussion 539.
2. Greeley WJ, Kern FH, Meliones JN, Ungerleider RM. Effect of deep hypothermia and circulatory arrest on cerebral blood flow and metabolism. *The Annals of thoracic surgery*. 1993 Dec;56(6):1464–6.
3. Englum BR, He X, Gulack BC, Ganapathi AM, Mathew JP, Brennan JM, et al. Hypothermia and cerebral protection strategies in aortic arch surgery: a comparative effectiveness analysis from the STS Adult Cardiac Surgery Database. *European journal of cardio-thoracic surgery : official journal of the European Association for Cardio-thoracic Surgery*. 2017 Sep;52(3):492–8.

4. Geube M, Sale S, Svensson L. Con: Routine Use of Brain Perfusion Techniques Is Not Supported in Deep Hypothermic Circulatory Arrest. *Journal of Cardiothoracic and Vascular Anesthesia* [Internet]. 2017;31(5):1905–9. Available from: <http://dx.doi.org/10.1053/j.jvca.2017.02.024>
5. Itagaki S, Chikwe J, Sun E, Chu D, Toyoda N, Egorova N. Impact of Cerebral Perfusion on Outcomes of Aortic Surgery: The Society of Thoracic Surgeons Adult Cardiac Surgery Database Analysis. *The Annals of thoracic surgery*. 2020 Feb;109(2):428–35.
6. Mizrahi EM, Patel VM, Crawford ES, Coselli JS, Hess KR. Hypothermic-induced electrocerebral silence, prolonged circulatory arrest, and cerebral protection during cardiovascular surgery. *Electroencephalography and clinical neurophysiology*. 1989 Jan;72(1):81–5.
7. Shin’oka T, Nollert G, Shum-Tim D, du Plessis A, Jonas RA. Utility of near-infrared spectroscopic measurements during deep hypothermic circulatory arrest. *The Annals of thoracic surgery*. 2000 Feb;69(2):578–83.
8. Purkayastha S, Sorond F. Transcranial Doppler ultrasound: technique and application. *Seminars in neurology*. 2012 Sep;32(4):411–20.
9. Naqvi J, Yap KH, Ahmad G, Ghosh J. Transcranial Doppler ultrasound: a review of the physical principles and major applications in critical care. *International journal of vascular medicine*. 2013;2013:629378.
10. Dehaes M, Cheng HH, Buckley EM, Lin P-Y, Ferradal S, Williams K, et al. Perioperative cerebral hemodynamics and oxygen metabolism in neonates with single-ventricle physiology. *Biomedical optics express*. 2015 Dec;6(12):4749–67.
11. Durduran T, Zhou C, Buckley EM, Kim MN, Yu G, Choe R, et al. Optical measurement of cerebral hemodynamics and oxygen metabolism in neonates with congenital heart defects. *Journal of biomedical optics*. 2010;15(3):37004.
12. Buckley EM, Hance D, Pawlowski T, Lynch J, Wilson FB, Mesquita RC, et al. Validation of diffuse correlation spectroscopic measurement of cerebral blood flow using phase-encoded velocity mapping magnetic resonance imaging. *Journal of biomedical optics*. 2012 Mar;17(3):37007.
13. Durduran T, Choe R, Baker WB, Yodh AG. Diffuse Optics for Tissue Monitoring and Tomography. *Reports on progress in physics Physical Society (Great Britain)*. 2010 Jul;73(7).
14. Busch DR, Rusin CG, Miller-Hance W, Kibler K, Baker WB, Heinle JS, et al. Continuous cerebral hemodynamic measurement during deep hypothermic circulatory arrest. *Biomedical optics express*. 2016 Sep;7(9):3461–70.
15. Ferradal SL, Yuki K, Vyas R, Ha CG, Yi F, Stopp C, et al. Non-invasive Assessment of Cerebral Blood Flow and Oxygen Metabolism in Neonates during Hypothermic Cardiopulmonary Bypass: Feasibility and Clinical Implications. *Scientific reports*. 2017 Mar;7:44117.
16. Baker WB, Balu R, He L, Kavuri VC, Busch DR, Amendolia O, et al. Continuous non-invasive optical monitoring of cerebral blood flow and oxidative metabolism after acute brain injury. *Journal of cerebral blood flow and metabolism : official journal of the International Society of Cerebral Blood Flow and Metabolism*. 2019 Aug;39(8):1469–85.
17. Lu H, Xu F, Rodrigue KM, Kennedy KM, Cheng Y, Flicker B, et al. Alterations in cerebral metabolic rate and blood supply across the adult lifespan. *Cerebral cortex (New York, NY : 1991)*. 2011 Jun;21(6):1426–34.
18. Carp SA, Farzam P, Redes N, Hueber DM, Franceschini MA. Combined multi-distance frequency domain and diffuse correlation spectroscopy system with simultaneous data acquisition and real-time analysis. *Biomedical optics express*. 2017 Sep;8(9):3993–4006.
19. Fantini S, Franceschini MA, Gratton E. Semi-infinite-geometry boundary problem for light migration in highly scattering media: a frequency-domain study in the diffusion approximation. *Journal of the Optical Society of America B*. 1994;11(10):2128.
20. Fantini S, Franceschini MA, Fishkin JB, Barbieri B, Gratton E. Quantitative determination of the absorption spectra of chromophores in strongly scattering media: a light-emitting-diode based technique. *Applied optics*. 1994 Aug;33(22):5204–13.
21. Leshnowar BG, Rangaraju S, Allen JW, Stringer AY, Gleason TG, Chen EP. Deep Hypothermia With Retrograde Cerebral Perfusion Versus Moderate Hypothermia With Antegrade Cerebral Perfusion for Arch Surgery. *The Annals of thoracic surgery*. 2019 Apr;107(4):1104–10.
22. Ehrlich MP, Hagl C, McCullough JN, Zhang N, Shiang H, Bodian C, et al. Retrograde cerebral perfusion provides negligible flow through brain capillaries in the pig. *The Journal of thoracic and cardiovascular surgery*. 2001 Aug;122(2):331–8.
23. Halstead JC, Meier M, Wurm M, Zhang N, Spielvogel D, Weisz D, et al. Optimizing selective cerebral perfusion: deleterious effects of high perfusion pressures. *The Journal of thoracic and cardiovascular surgery*. 2008 Apr;135(4):784–91.
24. Hori D, Brown C, Ono M, Rappold T, Sieber F, Gottschalk A, et al. Arterial pressure above the upper cerebral autoregulation limit during cardiopulmonary bypass is associated with postoperative delirium. *British journal of anaesthesia*. 2014 Dec;113(6):1009–17.
25. Hori D, Max L, Laflam A, Brown C, Neufeld KJ, Adachi H, et al. Blood Pressure Deviations From Optimal Mean Arterial Pressure During Cardiac Surgery Measured With a Novel Monitor of Cerebral Blood Flow and Risk for Perioperative Delirium: A Pilot Study. *Journal of cardiothoracic and vascular anesthesia* [Internet]. 2016 Jun;30(3):606–612. Available from: <https://europepmc.org/articles/PMC5508106>
26. Zaninovich OA, Ramey WL, Walter CM, Dumont TM. Completion of the Circle of Willis Varies by Gender, Age, and Indication for Computed Tomography Angiography. *World neurosurgery*. 2017 Oct;106:953–63.
27. Kleiser S, Nasserri N, Andresen B, Greisen G, Wolf M. Comparison of tissue oximeters on a liquid phantom with adjustable optical properties. *Biomedical optics express*. 2016 Aug;7(8):2973–92.
