# Supplementary material for: Diffuse correlation spectroscopy used to monitor cerebral blood flow during adult hypothermic circulatory arrests
Source: bioRxiv or medRxiv preprint supplement (doi:10.1101/2020.05.14.20098509), 2020-12-29
Supplement: Supplementary file [file 2020.05.14.20098509-1.pdf]

## **Diffuse correlation spectroscopy with oximetry disentangles the efficacy of cerebral blood flow during hypothermic circulatory arrests**

### **Supplementary Materials**

#### *FDNIRS-DCS Device*

DCS and FDNIRS detectors acquire data in parallel, with the DCS laser always on and the eight FDNIRS lasers turned on sequentially in rapid succession (10 Hz). Crosstalk between the two components is eliminated by optical filters in front of the detectors. To comply with the American National Standards Institute's standards, the DCS laser power was set at below 34 mW, the FDNIRS laser power between 2-3 mW, and the light at the probe was diffused over an area > 1mm. A full description of the device operation can be found in Carp et al (1).

#### *FDNIRS Analysis*

We used custom MATLAB code for analysis. In preprocessing, we smoothed the 10 Hz FDNIRS AC and phase using a 50-point averaging window, down-sampling to 0.2 Hz. The FDNIRS data had interference from the hospital oximeter and affected data was removed during preprocessing. In two subjects the interference was particularly strong, hence we had to discard large sections of the raw data and only recovered discontinuous SO<sub>2</sub> measurements. The hospital CW cerebral oximeter employs 730nm and 810nm LEDs at < 30 Hz, while our FDNIRS employs 8 wavelengths at 10 Hz. The light cross-talk of the two devices results in spurious peaks in the FDNIRS signal, which appear at different wavelengths and different times throughout the surgery. By using Fourier analysis, we found and discarded data segments. We also interpolated across short periods where the interference was particularly strong to remove this interference. The raw signal for one of these patients is shown in Figure 6. In subjects 11 and 12, our probe was so close to the hospital oximeter's probe that we could not recover a continuous signal, but rather only segments. The strength of this interference is shown in Figure 7.

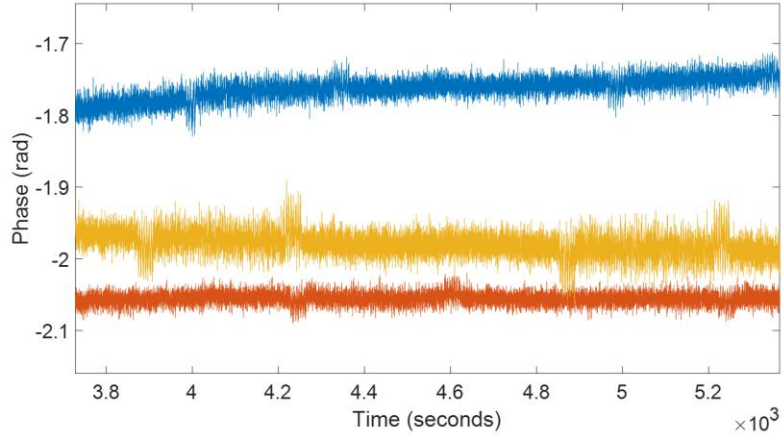

**Fig 6:** FDNIRS phase data from patient ID #6. This shows several wavelengths in a single detector raw with no preprocessing. The small jumps in the raw signal are due to the repetitive interference caused by the 30 Hz light modulation of the INVOS oximeter. Each jump is roughly 50 seconds wide.

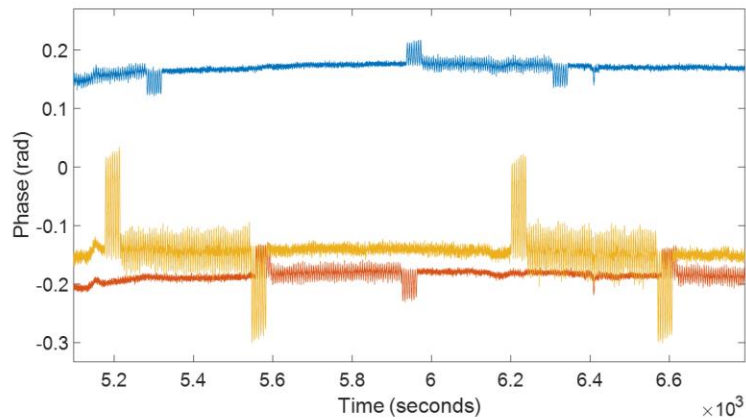

**Fig 7:** FDNIRS AC data from patient ID #12, one of the two patients where the interference was so strong that we could only recover sections of FDNIRS data. Each interference section is ~7 minutes wide, making potential interpolation impossible. For these patients, rather than linearly interpolating, we completely removed interference sections before analysis.

After preprocessing the raw data, we used the frequency domain multi-distance method (2) to compute the optical properties of the measured tissue. At each wavelength, the slope of the relationship between AC amplitude and phase with the source-detector distance was used to quantify the absorption and scattering coefficients,  $\mu_a$  and  $\mu_s'$ , respectively. The optical properties are ascertained under the assumption that the source-detector distance and optical properties observe the relation:  $r\sqrt{3\mu_a\mu_s'} \gg 1$ . After calculating  $\mu_a$  and  $\mu_s'$ , we further compute the oxy, deoxy and

total hemoglobin concentration, as well as the tissue oxygen saturation ( $SO_2$ ) from the multi-wavelength  $\mu_a$  values after assuming a water fraction in tissue of 0.75.

### *DCS Analysis*

The raw DCS data were smoothed in preprocessing to clean general artifacts. We smoothed the autocorrelation data using a 10-point averaging window for subjects 1-3 and a 50-point window for subjects 4-12, to achieve a final sampling rate of 0.2 Hz in all subjects. We further smoothed the optical property data used in processing the DCS measurements with a 5-point moving average.

We analyze the DCS data using the semi-infinite medium boundary condition for correlation diffusion equation (2). Raw autocorrelation curves and optical properties are used to find the blood flow index ( $BF_i$ ). For 6 patients (4, 6-10) we used the optical properties that are calculated using our FDNIRS measurements for  $CMRO_{2i}$  calculations, and fixed optical properties for all other calculations and comparisons. For measured optical properties, the absorption at 850 nm is calculated by assuming a 0.75 fraction of water in tissue and using the extinction coefficients for water and hemoglobin at 850 nm. The scattering at 850 nm is calculated by linearly fitting the scattering at the FDNIRS wavelengths and extrapolating to 850 nm. The other 6 patients (#1-3, 5, 11-12) only used the fixed optical property values ( $\mu_a = 0.12$ ,  $\mu_s' = 8.94$ ) that we got by averaging all  $\mu_a$  and  $\mu_s'$  values from patients where we have measured properties. We also ran all measurements with fixed optical properties to compare the blood flow index calculated using fixed versus measured optical properties and confirmed that there was no significant change in quantified blood flow drops.

### *Quantification of $CBF_i$ changes at circulatory arrests*

We used the 25 mm separation for the long separation in our quantifications for all patients except #12, where we used 30 mm, since the measurement team chose to only use 5 mm and 30 mm for that patient on the day of the measurement. Also, measurements in patient #5 were done with a DCS-only device with the same design and laser as the DCS portion of the MetaOx system, but with only 4 photon-counting modules, as used in a study by Buckley et al (3).

*Other parameters of interest at circulatory arrests*

| Perfusion Group | CBF <sub>i</sub> Drop (%) | CBF <sub>i</sub> Overshoot (multiplier) | SO <sub>2</sub> Baseline (FDNIRS, %) | SO <sub>2</sub> Drop (FDNIRS, %) | INVOS Left Baseline (%) | INVOS Left Drop (%) | INVOS Right Baseline (%) | INVOS Right Drop (%) | MAP Baseline (mmHg) | MAP Drop (%) |
|-----------------|---------------------------|-----------------------------------------|--------------------------------------|----------------------------------|-------------------------|---------------------|--------------------------|----------------------|---------------------|--------------|
| HCA-Only        | 94.6 ± 1.0%               | 2.6 ± 0.8                               | 59 ± 7%                              | 18 ± 4%                          | 77 ± 7%                 | 27 ± 10%            | 70 ± 0.6%                | 26 ± 10%             | 64 ± 4              | 79 ± 3%      |
| RCP             | 91 ± 3%                   | 2.92* <sup>‡</sup>                      | 70.2%*                               | 13%*                             | 95%*                    | 7%*                 | 95%*                     | 12%*                 | 64 ± 7              | 75 ± 10%     |
| ACP             | -12 ± 28%                 | N/A                                     | 59 ± 14%                             | 3.4 ± 1.8%                       | 91 ± 3%                 | 10 ± 11%            | 83 ± 7%                  | 2 ± 6%               | 73 ± 28             | 24 ± 29%     |

**Table 2:** Group-level quantification of CBF<sub>i</sub>, SO<sub>2</sub>, INVOS and MAP behavior at circulatory arrests. Baseline is equivalent to Pre-CA window defined for CBF<sub>i</sub> and SO<sub>2</sub>. \*Error not included since ≤ 2 patients had this measurement. <sup>‡</sup>RCP with Patient ID #2 had the pump turn on and off so many times that we could not pick out a single overshoot to make the comparison, so it was not included in the measurement.
